# Supplementary material
Source: PubMed Central journal article supplement (PMC5689130)
Supplement: Supp_Table1.pdf [file Supp_Table1.pdf]

## Supplementary Data

SUPPLEMENTARY TABLE S1. LIST OF mRNA  
OVEREXPRESSED IN 100K EXTRACELLULAR VESICLES

| <i>Gene symbol</i> | <i>Gene name</i>                    |
|--------------------|-------------------------------------|
| CCNB1              | Cyclin B                            |
| CDC6               | Cell division cycle 6               |
| CDK8               | Cyclin-dependent protein kinase 8   |
| MRE11A             | Double-strand break repair nuclease |
| RAD1               | Cell cycle checkpoint protein RAD1  |
| E2F4               | Transcription factors E2F4          |
| BCL2               | B cell lymphoma 2                   |
